## **Calcium-Calmodulin Gating of Connexin43 Gap Junctions in the Absence of the pH**

### **Gating Domain**

Siyu Wei<sup>1</sup>, Christian Cassara<sup>1</sup>, Xianming Lin<sup>2</sup>, Richard D Veenstra<sup>1</sup>

<sup>1</sup>Department of Pharmacology, SUNY Upstate Medical University, Syracuse, NY 13210

<sup>2</sup>Leon H. Charney Division of Cardiology, Department of Medicine, New York University School of Medicine, New York, NY, 10016, USA.

Corresponding Author:  
Richard D Veenstra, Ph.D.  
Department of Pharmacology  
SUNY Upstate Medical University  
750 East Adams Street  
Syracuse, NY 13210  
Phone: 315-464-5145  
Fax: 315-464-8014  
E-mail: [veenstr@upstate.edu](mailto:veenstr@upstate.edu)

Running Title: Gating of Cx43 gap junctions by calcium

## Abstract

Intracellular protons and calcium ions are two major chemical factors that regulate connexin43 (Cx43) gap junction channels and the synergism or antagonism between pH and  $\text{Ca}^{2+}$  has been questioned for decades. In this study, we assessed whether the calcium gating mechanism occurs independently of the pH gating mechanism by utilizing the Cx43-M257 (Cx43K258stop) mutant, a carboxyl-terminal (CT) truncated version of Cx43 lacking the pH gating domain. Dual whole cell patch clamp experiments were performed on Neuroblastoma-2a (N2a) cells or neonatal mouse ventricular myocytes (NMVMs) expressing either full length Cx43 or Cx43-M257 proteins. Addition of 1  $\mu\text{M}$  ionomycin to normal calcium saline reduced Cx43 or Cx43-M257 macroscopic gap junction conductance ( $g_j$ ) to zero within 15 min of perfusion, while this response was prevented by omitting 1.8 mM  $\text{CaCl}_2$  from the external solution or adding 100 nM calmodulin (CaM) inhibitory peptide to the internal pipette solution. The ability of connexin calmodulin binding domain (Cx CaMBD) mimetic peptides and the Gap19 peptide to inhibit the  $\text{Ca}^{2+}$ /CaM gating response of Cx43 gap junctions was also examined. Internal addition of a Cx50 cytoplasmic loop CaMBD peptide (200 nM) prevented the  $\text{Ca}^{2+}$ /ionomycin-induced decrease in Cx43  $g_j$ , while 100  $\mu\text{M}$  Gap19 peptide had no effect. Lastly, the transjunctional voltage ( $V_j$ ) gating properties of NMVM Cx43-M257 gap junctions were investigated. We confirmed that the fast kinetic inactivation component was absent in Cx43-M257 gap junctions, but also observed that the previously reported facilitated recovery of  $g_j$  from inactivating potentials was abolished by CT truncation of Cx43. We conclude that CT pH gating domain of Cx43 contributes to the  $V_j$ -dependent fast inactivation and facilitated recovery of Cx43 gap junctions, but the  $\text{Ca}^{2+}$ /CaM-dependent gating mechanism remains intact. Sequence-specific Cx CaMBD mimetic peptides act by binding  $\text{Ca}^{2+}$ /CaM non-specifically and the Cx43 mimetic Gap19 peptide has no effect on this chemical gating mechanism.

## Introduction

Formed by a 20 member protein family, gap junctions are composed of a hexamer of connexin (Cx) subunits in each cell membrane that dock extracellularly to form an intercellular aqueous pore that facilitates the passage of ions, second messengers, fluorescent dyes, small nucleic acids, etc., virtually any solute under 1 kDa in molecular mass and 14 Å in width (1,2). Gap junctions are thought to be regulated by two general gating mechanisms, a fast transjunctional voltage ( $V_j$ ) gating mechanism and a slow chemical gating mechanism (3). Chemical agents known to close gap junctions include intracellular calcium ions, intracellular pH, lipophiles, protein phosphorylation, and so on (4). Since the mid-1970s, intracellular calcium ions and pH have been known to uncouple gap junctions, though opinions varied about the relative importance of each to the uncoupling process first referred to as the “healing-over” in the heart (5-8). Though synergistic actions of cytosolic  $\text{Ca}^{2+}$  and  $\text{H}^+$  have been reported, opposing viewpoints on the operative role of  $\text{Ca}^{2+}$  ions or protons have persisted for decades without resolution (9-12).

Definitive evidence of a pH gating mechanism associated with connexin43 (Cx43), the connexin with the most widespread expression pattern, was provided when truncation of last 125 amino acids of the cytoplasmic carboxyl terminus (CT) abolished the pH sensitivity of Cx43 gap junction conductance ( $g_j$ ) (13). This pH gating mechanism for Cx43 gap junctions was further defined by the demonstration that the distal CT pH gating particle binds to a receptor domain located in region 119-144 of the Cx43 cytoplasmic loop (CL) in a pH-dependent manner (14). The calcium gating hypothesis evolved to the action of calmodulin (CaM) based on the inhibition of gap junction uncoupling by calmodulin (CaM) inhibitors and evidence that CaM binds to Cx32 and lens gap junctions (15-17). Since the identification of CaM binding domains

(CaMBDs) on the cytoplasmic amino- and carboxyl termini of Cx32, additional connexin CaMBDs have been identified on the CL domain of Cx43, Cx50, Cx46 (sheep Cx44), and Cx45 (18-21). Previous studies in this laboratory indicated that  $\text{Ca}^{2+}/\text{CaM}$  causes a gated closure of Cx43 and Cx50 gap junctions as evidenced by the reduced open probability of gap junction channels during perfusion of coupled cell pairs with the calcium ionophore ionomycin (20,22). In this study, we tested the ability of the  $\text{Ca}^{2+}/\text{CaM}$  to cause the gated closure of Cx43 gap junctions using the previously published CT-truncated version of Cx43, Cx43-M257 expressed in mouse neuro2a (N2a) cells. We also employed the Cx43<sup>+K258stop</sup> mouse, which heterologously expresses the Cx43-M257 (K258stop) protein (23), to examine this chemical gating mechanism using an endogenous expression system, homozygous Cx43-M257 neonatal mouse ventricular cardiomyocytes (NMVMs). We found that superfusion of Cx43-M257 expressing cell pairs with 1.8 mM  $\text{CaCl}_2$  saline containing 1  $\mu\text{M}$  ionomycin inhibited gap junction conductance ( $g_j$ ) by 100% in a calcium- and calmodulin-dependent manner. We further tested the ability of connexin CaMBD mimetic peptides to inhibit the Cx- $\text{Ca}^{2+}/\text{CaM}$  gating mechanism in a sequence-specific manner and found that 200 nM of the higher CaM affinity Cx50-3 peptide was sufficient to block the  $\text{Ca}^{2+}/\text{CaM}$ -induced uncoupling of Cx43 gap despite the Cx43-3 CaMBD site possessing a distinct sequence from the Cx50 CaMBD. Conversely, the Gap19 peptide, which targets a CL sequence immediately adjacent to the known Cx43 CaMBD site (24), did not inhibit the  $\text{Ca}^{2+}/\text{CaM}$ -induced uncoupling process. Finally, we also examined the  $V_j$ -gating properties of Cx43-M257 gap junctions in paired NMVMs and found that the fast kinetic component of the  $V_j$ -dependent gating mechanism was abolished as previously reported in *Xenopus* oocytes and N2a cells (25,26). The probability of the 50 pS subconductance state of Cx43 gap junction channels was similarly reduced in favor of the 100 pS main open state of the channel.

Additionally, the increased slope  $g_j$  during the recovery from  $V_j$ -dependent inactivation previously observed only in primary NMVM gap junctions was also eliminated by the CT truncation of Cx43. Our findings indicate that the  $Ca^{2+}$ /CaM-dependent gating mechanism of Cx43 gap junctions remains intact after deletion of the CT pH gating domain, that sequence-specific Cx CaMBD peptides function as non-specific CaMBDs to bind CaM, that the Gap19 peptide does not influence this gating mechanism, and the Cx43 distal CT domain is somehow involved in the “facilitated” recovery of  $g_j$  after  $V_j$ -dependent inactivation.

## **Materials and Methods**

### *Cell Cultures*

Murine Neuro2a neuroblastoma (N2a) cells, grown to 70-90% confluency, were cultured in 12 well culture dishes containing MEM media supplemented with 10% fetal bovine serum and transiently transfected with 1  $\mu$ g of plasmid cDNA containing full-length (WT) Cx43 or Cx43-M257 cDNA sequences using Lipofectamine2000 and OptiMEM according to manufacturer’s directions (ThermoFisher Scientific). Full length Cx43 pTracer-CMV2 and Cx43-M257 pIRES2-EGFP plasmids were purified using the EndoFree plasmid minikit (Qiagen). N2a cells were lightly trypsinized after 4 hrs and plated in 35 mm culture dishes overnight for patch clamp electrophysiology studies the next day.

All cardiomyocyte experiments were performed on enzymatically dissociated neonatal C57BL/6 murine ventricular myocytes cultured for 48–72 h according to published procedures (27). The newborn mice were euthanized under isoflurane anesthesia in accordance with procedures

approved by the Institutional Animal Care and Use Committee (IACUC) conforming to the Guide for the Care and Use of Laboratory Animals published by the US National Institutes of Health (NIH Publication No. 85-23, revised 1996). Newborn litters from heterozygous Cx43-M257 (Cx43K258stop) mouse matings were collected and the ventricle and tail of each newborn pup was numbered for separate enzymatic dissociation and genotyping. Genomic DNA was obtained using the DNeasy Blood and Tissue kit (Qiagen) and subjected to polymerase chain reaction (PCR) analysis using Taq polymerase (ThermoFisher Scientific) and M257 forward (5'-CAA AAC ACC CCC CAA GGA ACC TAG) and reverse (5' GCA TCC TCT TCA AGT CTG TCT TCG) primers as originally described (23).

### *Electrophysiology*

Gap junctional current ( $I_j$ ) recordings were acquired using dual whole cell patch clamp procedures (28). N2a or neonatal murine ventricular myocyte (NMVM) cell pairs were held at -40 mV and a voltage step ( $\Delta V$ ) was applied to one cell while maintaining the holding potential ( $V_h = -40$  mV) of the partner cell. The macroscopic junctional conductance ( $g_j$ ) was calculated by the equation:  $g_j = -\Delta I_2 / [(V_1 + \Delta V) - V_2]$  where  $I_1$  and  $I_2$  are whole cell currents,  $V_1$  and  $V_2$  are command voltages, and  $(V_1 + \Delta V) - V_2 =$  the transjunctional potential,  $V_j$ . For all experiments,  $g_j$  was normalized by dividing the time-dependent  $g_j$  by the initial  $g_j$  measurement, or  $G_j = g_j / g_{j,initial}$ . To more accurately calculate  $g_j$ , the whole cell patch electrode resistances,  $R_{el1}$  and  $R_{el2}$ , were subtracted from the  $g_j = -\Delta I_2 / V_j$  calculation where the actual  $g_j = \text{apparent } g_j - (1/R_{el1} + 1/R_{el2})$ .  $R_{el} = \tau_{cap} / C_{input}$  where  $\tau_{cap}$  is the single cell capacitive current decay time constant and  $C_{input}$  is the input resistance of each cell. The bath saline contained (in mM): 142 NaCl, 1.3 KCl, 4 CsCl, 2 tetraethylammonium chloride, 0.8 MgSO<sub>4</sub>, 0.9 NaH<sub>2</sub>PO<sub>4</sub>, 1.8 CaCl<sub>2</sub>, 5.5 dextrose, and 10 HEPES (titrated to pH 7.4 with 1 N NaOH). 1.8 mM CaCl<sub>2</sub> was omitted from the Ca<sup>2+</sup>-free

saline. Ionomycin (1  $\mu$ M, I3909, Sigma-Aldrich) was added to the perfusion saline fresh daily.

The internal pipette solution (IPS) contained (in mM): 140 KCl, 1.0 MgCl<sub>2</sub>, 0.3 KBAPTA, 25 HEPES (titrated to pH 7.40 with 1 N KOH).

The peptide inhibition studies of Ca<sup>2+</sup>/CaM-dependent uncoupling of Cx43 gap junctions was performed by adding the inhibitory peptides to the IPS of both cells on the day of use at concentrations dependent upon their measured K<sub>d</sub>. Calmodulin (CaM) inhibition was achieved by adding 100 nM CaM inhibitory peptide corresponding to the CaMBD of CaM kinase II (Enzo Life Sciences, #BML-P200-0500) with a reported K<sub>d</sub> of 52 nM. The Cx50 CaMBD peptide, corresponding to the Cx50 cytoplasmic loop sequence

141-SSKGTKKFRLEGTLRLTYVCHIIFKT-166 and its scrambled control

(FKLYKCISFGGTEITRSHVLTKKRL) were published previously (20). The CaMBD peptide was added to the IPS at a concentration of 200 nM. The Gap19 peptide (Sigma-Aldrich, #SML1426) was applied intracellularly at a concentration of 100  $\mu$ M (24).

### *Immunocytochemistry*

For immunocytochemical studies, NMVMs were cultured on poly-L-lysine coated coverslips for 48-72 hrs and immunolabeled for Cx43 protein using previously published procedures (27).

Coverslips were rinsed in phosphate-buffered saline (PBS, pH 7.0), fixed with 4% paraformaldehyde in PBS, rinsed, permeabilized with 1% Triton X100 in PBS, and blocked with 2% goat serum in 1% Triton X100 PBS, all for 15 min at room temperature. Anti-Cx43 rabbit polyclonal amino-terminal (Abgent, #AP1541b) and mouse monoclonal carboxyl-terminal (ThermoFisher #35-5000) antibodies were diluted 1:200 in 2% goat serum, 1% triton X-100 PBS and added to the 12 mm diameter coverslip overnight at 4 °C. Each well was rinsed 3-5 times

with PBS the next day and incubated with goat anti-rabbit Alexa Fluor 488 (ThermoFisher #11008) and anti-mouse Alexa Fluor 546 (ThermoFisher #11003) secondary antibodies, diluted 1:1500 in 10% goat serum PBS, for 30 min at room temperature. After rinsing, the cells were labeled with DAPI for 10 min, rinsed with PBS and finally with pure water, blotted dry, and mounted on a glass slide using ProLong antifade mounting reagent and cured overnight in the dark.

Sealed glass coverslips were viewed with an Olympus IX-70 microscope using a Sutter Instruments LS 175 W Xenon arc lamp epifluorescence illumination system and Lambda 10–2 filter wheel controller with 484/15 or 555/25 nm band pass excitation filters and FITC or FITC/Cy3/Cy5 dichroic mirror/emitter filter sets (Chroma Technology Corp, #41001 or #62005). DNA staining was observed with a 365/10 nm excitation filter and DAPI 460/50 nm dichroic mirror/emitter filter set (Chroma, 31000v2-dapi-hoechst-amca). Fluorescent micrographs were acquired with an Andor iXon 885 ECCD camera using Imaging Workbench 6.0 software (INDEC Systems, Santa Clara, CA). Exported TIF files were background subtracted ( $\approx 10\%$ ) and green/red/blue color processed using ImageJ software. Magnification was 600X using an Olympus PlanApo 1.40/0.17 aperture 60X oil immersion and 10X C-mount objectives.

## Results

To examine the  $\text{Ca}^{2+}$ /CaM gating of Cx43-M257 gap junctions, we employed the same ionomycin perfusion assay from our previous study on the full length wild-type (WT) Cx43 (22). When coupled WT or Cx43-M257 N2a cell pairs were superfused with normal saline containing 1  $\mu\text{M}$  ionomycin and 1.8 mM  $\text{CaCl}_2$ , junctional currents ( $I_j$ ) in response to a -20 mV  $V_j$  pulse declined steadily from initial levels to zero during 8-12 min of perfusion at a rate of 1 ml/min



(Fig. 1A, B). The average junctional conductance ( $g_j$ ) was  $26.4 \pm 6.2$  nS for the WT Cx43 and  $29.1 \pm 7.7$  nS for the Cx43-M257 cell pairs (mean  $\pm$  SEM,  $n = 7, 6$ ). The average normalized  $G_j$  ( $= g_{j(\text{time})}/g_{j(\text{initial})}$ ) declined to 0 nS within 8 min from the onset of perfusion for both WT Cx43 and Cx43-M257 gap junctions (Fig. 1D,E). Omission of the 1.8 mM  $\text{CaCl}_2$  from the perfusate or the addition of 100 nM CaM (CaMKII 290-309) inhibitory peptide to the whole cell patch pipette solutions prevented the rundown of Cx43-M257  $I_j$  (Figs. 1C, E, F). The average  $g_j$  was  $18.6 \pm 6.9$  nS for the zero  $\text{Ca}^{2+}$  and  $30.3 \pm 6.9$  nS for the CaM inhibitory peptide Cx43-M257 experiments (mean  $\pm$  s.e.m.,  $n = 6, 6$ ). These results are consistent with previous findings using the full length Cx43 and are indicative of a calcium/calmodulin-dependent gating mechanism even with the absence of the Cx43 pH gating domain (13,22).

The above Cx43-M257 experiments were performed using the exogenous N2a cell expression system and a Cx43K258stop mouse was later developed that expresses the CT-truncated (K258stop = M257) form of Cx43 in a heterozygous manner (23). Thus, mouse ventricular cardiomyocytes were cultured from the hearts of newborn littermates from heterozygous Cx43<sup>+/K258stop</sup> mice matings. The genotype of each newborn pup was determined by PCR analysis of tail DNA samples and confirmed by immunocytochemical labeling of cultured cardiomyocytes using amino-terminal and carboxyl-terminal anti-Cx43 antibodies (Fig. 2A,B). The Cx43-NT antibody recognizing both forms of Cx43 was secondarily labeled with Alexa Fluor488 (green) and the Cx43-CT antibody, which would recognize only the full-length WT Cx43, was labeled with Alexa Fluor546 (red). Homozygous Cx43-M257 cardiomyocytes were devoid of Cx43-CT immunolabeling (Fig. 2A) whereas the WT Cx43 cardiomyocytes were immunolabeled by both anti-Cx43 antibodies (Fig. 2B). Perfusion of Cx43-M257 and WT Cx43 paired cardiomyocytes with 1.8 mM  $\text{CaCl}_2$  + 1  $\mu\text{M}$  ionomycin saline resulted in complete

uncoupling within 8 min of perfusion, similar to the results obtained in N2a cells. The average  $g_j$  was  $54.2 \pm 6.2$  and  $39.3 \pm 4.7$  nS for the Cx43-M257 and WT-Cx43 cardiomyocyte pairs ( $n = 7$ , 7).

We had previously shown that connexin mimetic peptides corresponding to the CaMBD of Cx43 and Cx50 were capable of preventing the uncoupling of their respective gap junctions during  $Ca^{2+}$ -ionomycin perfusion (20,22). To test the specificity of these Cx CaMBD mimetic peptides, we tested different concentrations of the Cx50-3 peptide in WT Cx43 N2a cell pairs (Fig. 3A). We found that 200 nM Cx50-3 peptide was sufficient to completely prevent the decline in  $G_j$  during ionomycin perfusion of Cx43 gap junctions. The scrambled control Cx50-3 peptide, however, failed to prevent uncoupling during 10-12 min of  $Ca^{2+}$ -ionomycin perfusion. These results suggest that any Cx mimetic peptide that is capable of binding CaM will interfere with the  $Ca^{2+}$ /CaM-dependent gating mechanism in a connexin non-specific manner. The average  $g_j$  was  $14.9 \pm 5.7$  and  $34.4 \pm 8.1$  nS for the Cx50-3 and scrambled control peptide experiments ( $n = 5$ , 3).

The Cx43-3 CaMBD (136-158) is adjacent to the CL “L2” (119-144) region identified as the receptor for the CT pH gating domain of Cx43 (14). Recently, a Gap19 peptide targeting the central portion of the L2 region, 128-KQIEIKKFK-136, was developed and shown to inhibit Cx43 hemichannel function without inhibiting  $g_j$  (24). Given the close proximity of the Gap19 region to the known Cx43 CaMBD, we wanted to test for possible effects of the Gap19 peptide on the  $Ca^{2+}$ /CaM-dependent uncoupling of Cx43 gap junctions. In seven  $Ca^{2+}$ -ionomycin perfusion experiments, inclusion of 100  $\mu$ M Gap19 peptide in both patch pipettes did not prevent the uncoupling of WT Cx43 N2a cells pairs (Fig. 3B). The average  $g_j$  was  $31.8 \pm 5.9$  nS ( $n = 7$ ).

These results suggest that Gap19 does not affect the  $\text{Ca}^{2+}$ /CaM-dependent gating mechanism of Cx43 gap junctions.

Truncation of the Cx43 CT was also reported to alter the  $V_j$ -gating of Cx43 gap junctions by eliminating the “fast”  $V_j$ -gating mechanism to the 50 pS subconductance state of Cx43 gap junction channels (25,26). We had previously observed a hysteresis in the steady state  $G_j - V_j$  curve only in NMVMs termed “facilitation” wherein a slow (200ms/mV)  $V_j$  ramp from  $\pm 120$  mV back to 0 mV  $V_j$  resulted in a higher linear slope conductance at low  $V_j$  values than measured initially with increasing  $\pm V_j$  values from 0 mV (27). The previous  $V_j$ -gating studies of Cx43-M257 gap junctions were performed in *Xenopus* oocytes and N2a cells. Thus, we examined the  $V_j$ -gating properties of myocardial Cx43-M257 gap junctions using cultured NMVMs. Application of the slow  $\pm 120$  mV  $V_j$  ramp revealed the loss of facilitation in Cx43<sup>+K258stop</sup> ventricular cardiomyocyte gap junctions during the return recovery phase of the  $G_j - V_j$  curve (Fig. 4A, B). The average  $g_j$  of these  $V_j$ -gating experiments was  $7.2 \pm 1.4$  nS since  $V_j$ -dependent inactivation can be detected only in low  $g_j$  cell pairs.

We also examined the kinetics of the  $V_j$ -dependent activation in NMVM cell pairs using  $-V_j$  pulses and the ventricular action potential as previously described. The inactivation kinetics during  $V_j$  pulses from -60 to -140 mV confirmed the loss of the fast inactivation time constant and the presence of a distinct slow inactivation time constant relative to WT Cx43 NMVM gap junctions (Fig. 4C). The elimination of the Cx43 fast inactivation time constant also eliminated nearly all of the  $V_j$ -dependent inactivation during the 1 Hz simulated ventricular action potential (Fig. 4D). The inactivation rates ( $K_{on}$ ) were calculated using the expression  $K_{on} (\text{ms}^{-1}) = 1/\tau_{\text{inactivation}} = A^0 \cdot \exp(V_j/V_k) + C$  where  $A^0$  is the rate constant amplitude in  $\text{ms}^{-1}$ ,  $C$  is the minimum rate ( $\text{ms}^{-1}$ ), and  $V_k$  is the voltage constant for the inactivation rate (27,29). Exponential

fits of the WT slow inactivation rates and the M257 inactivation rates yielded rates of  $.0000244 \cdot \exp(V_j/17.2) + 0.00236$  for WT Cx43 NMVM gap junctions and  $0.0000504 \cdot \exp(V_j/22.8) - 0.000058$  for Cx43-M257 NMVM gap junctions. These data reveal that deletion of the CT terminus of Cx43 not only eliminated the fast inactivation of Cx43 gap junctions, but also reduced the inactivation rate and  $V_j$ -sensitivity of the remaining slow inactivation component of Cx43 gap junctions. We also measured the unitary gap junction channel currents from three of these M257 NMVM experiments and observed an abundance of 100 pS channel events with only brief occurrences of apparent 60 pS channel events with open probabilities too low to be discernable in all points histograms of the gap junction channel current recordings (Fig. 4 E,F). Together, these data from Cx43-M257 NMVMs confirm the elimination of the fast inactivation component of Cx43 gap junctions and abundance of 100 pS gap junction channel conductance ( $\gamma_j$ ) events, but also quantifies the reduction in the kinetics and  $V_j$ -sensitivity of the remaining slow inactivation component and demonstrates the removal of the facilitated recovery of  $g_j$  from inactivating potentials of Cx43 gap junctions.

## Discussion

The primary purpose of this study was to determine if the recently described  $\text{Ca}^{2+}/\text{CaM}$ -dependent gating mechanism exists in the absence of the Cx43 CT pH gating domain which abolished the pH-sensitivity of Cx43  $g_j$  (13,18,22). Perfusion of Cx43-M257 N2a or NMVM cell pairs with 1  $\mu\text{M}$  ionomycin saline containing normal 1.8 mM  $\text{CaCl}_2$  routinely induced 100% inhibition of Cx43  $g_j$  within 8-12 min from the onset of 1 ml/min perfusion (Figs. 1A,B,D,E and 2B). Consistent with previous findings using full length Cx43 expressed in N2a cells or wild-

type NMVMs (22), omission of the 1.8 mM CaCl<sub>2</sub> from the 1 μM ionomycin bath saline or addition of 100 nM CaMKII 290-309 CaM inhibitory peptide to both whole cell patch pipettes prevented the rundown of Cx43-M257 g<sub>j</sub> during 13 min of perfusion (Figs. 1C,E,F). Taken together, these data support the conclusion that the Ca<sup>2+</sup>- and CaM-dependent chemical gating mechanism of Cx43 gap junctions does not require the presence of the Cx43 distal CT pH gating particle.

The existence of Cx CaMBDs has been demonstrated by *in vitro* CaM binding assays with sequence-specific Cx mimetic peptides comprising the entire 15-26 amino acid CaMBDs of Cx32, Cx43, sheep Cx44 (Cx46), Cx45, and Cx50 (17-21). In past studies, these Cx CaMBD mimetic peptides were used as inhibitory peptides to validate the functional role of the Cx-specific sequence in the Ca<sup>2+</sup>/CaM gating of the parent connexin (20,22). However, like the CaMKII 290-309 inhibitory peptide which corresponds to the high affinity CaMBD of CaMKII, these peptides likely function purely on the basis of binding CaM and acting as a “CaM sponge” when added in excess to an intracellular pipette solution. To test this hypothesis, we applied increasing concentrations of the Cx50 CaMBD peptide to WT Cx43 gap junctions and found that 200 nM of the Cx50-3 peptide was sufficient to prevent the Ca<sup>2+</sup>/CaM-dependent inhibition of Cx43 g<sub>j</sub> (Fig. 3A). This observation indicates that inhibition of the Ca<sup>2+</sup>/CaM gating process by these Cx-sequence specific CaMBD mimetic peptides does not necessarily prove the functionality of the corresponding domain, it also does not necessarily disprove the functional relevance of these identified Cx CaMBD domains. Additional experiments and novel approaches will be required to test the functionality of known Cx CaMBDs in a sequence-specific manner.

Another Cx43 mimetic peptide, the Gap19 nonapeptide, targeting CL residues 128-136 in the middle of the L2 pH receptor domain (residues 119-144) was shown to inhibit Cx43 hemichannel activity with an intracellular  $IC_{50}$  of 6.5  $\mu$ M without affecting  $g_j$  at substantially higher concentrations (400  $\mu$ M) presumably by interfering with the CL-CT interaction (14,24). Since the Cx43 CaMBD peptide corresponds to CL residues 136-158, it is possible that Gap19 might interfere in the  $Ca^{2+}$ /CaM gating mechanism (18). To test this hypothesis, we performed the  $Ca^{2+}$ -ionomycin perfusion experiments on N2a-Cx43 cell pairs with 100  $\mu$ M Gap19 added to both whole cell patch pipettes (Fig. 3B). 100% inhibition of Cx43  $G_j$  was still achieved within 10-12 min of perfusion and no inhibition of  $g_j$  was evident. Our results confirm that Gap19 does not affect Cx43  $g_j$  nor the  $Ca^{2+}$ /CaM-dependent uncoupling mechanism.

The  $V_j$ -gating and  $\gamma_j$  properties of Cx43-M257 gap junctions were previously studied in exogenous *Xenopus* oocyte and N2a cell expression systems (25,26). Both studies reported a loss of the fast kinetic component of the  $V_j$ -gating mechanism and a lower  $G_{min}$  for the steady state  $G_j - V_j$  curve. Additionally, gap junction channel recordings from Cx43-M257 N2a cell pairs revealed a loss of the low  $\gamma_j$  subconductance state, an increased open time for the remaining  $\geq 100$  pS main conductance state with primarily slow transitions between the open and closed states of the channel (26). Previously, we had observed a hysteresis in the steady state  $G_j - V_j$  curves obtained during the application of slow 24 sec, 0 to  $\pm 120$  mV  $V_j$  ramps found only in primary NMVM cell pairs, not N2a-Cx43 cell pairs (27). The observed increase in the linear slope conductance at low  $V_j$  potentials, corresponding to the  $G_{max}$  of the steady state  $G_j - V_j$  curves, occurred during the recovery (from inactivation) phase of the  $\pm 120$  mV to 0 mV  $V_j$  ramp in NMVMs and was termed facilitation. This facilitated recovery of  $G_j$  was not affected by non-

specific serine/threonine protein kinase inhibitors (e.g. 12  $\mu$ M H7, data not shown) nor 100 nM rotigaptide, though the inactivation phase was reduced by these treatments (29).

Thus, we examined the effect of the Cx43 CT truncation on the  $V_j$ -gating properties on homozygous Cx43-M257 NMVMs. Our results confirmed the loss of the fast inactivation component of Cx43 gap junctions and predominance of the 100 pS main  $\gamma_j$  state of Cx43 gap junction channels seen in exogenous expression systems, but also the abolition of the facilitated recovery of  $G_j$  during decreasing  $V_j$  values after achieving steady state inactivation to  $G_{\min}$  (Fig. 4A-F). We did not, however, observe a reduction in  $G_{\min}$  compared to control WT NMVM gap junctions (27). The reduced rate and  $V_j$ -sensitivity of the remaining slow kinetic inactivation component of Cx43-M257 gap junctions implies that the Cx43 CT domain contributes some of the charge to the slow  $V_j$  gating mechanism of Cx43 gap junctions (25). Furthermore, the deletion of the facilitated recovery of  $G_j$  from inactivating potentials was only previously attained by non-selective histone deacetylase inhibition (pan-HDACI) by 100 nM trichostatin A or 1  $\mu$ M vorinostat implies that protein acetylation directly (e.g. Cx43 CT domain) or indirectly (e.g. tubulin?) affects the  $V_j$  gating properties of Cx43 gap junctions (30).

In summary, we conclude that the calcium/calmodulin-dependent chemical gating mechanism of Cx43 gap junctions does not require the distal CT pH gating particle of Cx43. The Gap19 peptide targeting a portion of the Cx43 CL pH receptor domain also does not affect the  $\text{Ca}^{2+}$ /CaM gating mechanism of Cx43, but the sequence-specific Cx-CaMBD mimetic peptides function as a non-specific CaM binding domain and do not necessarily infer the modulatory

function of these domains in their respective connexin-specific gap junctions. Lastly, we confirmed in Cx43-M257 cardiomyocyte gap junctions that deletion of the Cx43 CT domain eliminates the fast inactivation component and enhances the probability of the 100 pS main  $\gamma_j$  state of Cx43 gap junctions, but also eliminates the facilitated recovery of  $g_j$  from inactivation.

### **Acknowledgements**

We thank Dr. Steven Taffet for the gift of the Cx43-M257 pIRES2-EGFP plasmid.

We thank Dr. Karen Maass for providing us with the Cx43<sup>+K258stop</sup> mice and the methodology for genotyping these mice.

R.D.V. was supported by grants from the NIH HL042220, AHA 17GRNT33710031, Hendricks Fund, and Joseph C Georg Fund from the CNY Community Foundation.



## Figure Legends

**Figure 1.** Calcium/calmodulin-dependence of Cx43 gap junctions expressed in N2a cells. **A-C**, Whole cell current traces from the partner cell 2 of an N2a cell pair during a -20 mV, 5 sec transjunctional ( $V_j$ ) voltage pulse (inset, upper left) applied to cell 1 before (control) and during perfusion with 1  $\mu$ M ionomycin, 1.8 mM  $\text{CaCl}_2$  saline. Current traces from representative experiments illustrate the decline in junctional current ( $I_j = -\Delta I_2$ ) during ionomycin perfusion of an N2a cell pair expressing either full-length wild-type Cx43 (**A**) or carboxyl-tail truncated Cx43 (Cx43-M257, **B**) gap junctions, or the prevention of the calcium-induced decline in  $I_j$  by calmodulin (CaM) inhibition (**C**). **D**, The average (mean  $\pm$  SEM,  $n = 7$ ) decline in junctional conductance ( $G_j$ ) during  $\text{CaCl}_2$ /ionomycin perfusion of N2a-Cx43 cell pairs illustrating 100%  $G_j$  inhibition within 15 min of perfusion. **E**, Average  $G_j$  of N2a-Cx43-M257 cell pairs ( $n = 6$ ) during perfusion with 1.8 mM  $\text{CaCl}_2$  saline + ionomycin (■) illustrating complete uncoupling in the absence of the Cx43 pH gating domain, and the prevention of  $G_j$  inhibition by excluding  $\text{CaCl}_2$  from the 1  $\mu$ M ionomycin saline perfusate (○,  $n = 6$ ). **F**, Inclusion of 100 nM CaM inhibitory peptide in the patch pipettes of both cells also prevents inhibition of N2a-Cx43-M257  $G_j$  by calcium/ionomycin perfusion.

**Figure 2.** Calcium/CaM-dependent uncoupling of Cx43-M257 ventricular cardiomyocytes. **A**, Immunofluorescent labeling of Cx43-M257 cardiomyocyte gap junctions with anti-Cx43 amino-terminal (NT) and Alexa Fluor488 antibodies (green) and anti-Cx43 carboxyl-terminal (CT) and Alexa Fluor555 antibodies (red) illustrating the lack of the Cx43 CT domain in cardiomyocytes cultured from homozygous Cx43-M257 neonatal mice. **B**, Immunocytochemical labeling of wild-type Cx43 gap junctions illustrating the presence of the NT and CT domains in the

littermate control cardiomyocytes. **C**, The average  $G_j$  of both wild-type and Cx43-M257 cardiomyocyte gap junctions was completely inhibited by calcium + ionomycin saline perfusion, confirming the results obtained by exogenous expression of Cx43 constructs in N2a cells.

**Figure 3.** Effects of Connexin mimetic peptides on calcium/CaM-dependent uncoupling of Cx43 gap junctions. **A**, Connexin mimetic peptide of a confirmed Cx50 cytoplasmic loop (CL) calmodulin binding domain (CaMBDs) previously shown to inhibit  $Ca^{2+}$ /CaM-dependent uncoupling was tested on Cx43 wild type gap junctions (20). Complete inhibition of Cx43 gap junction uncoupling was achieved with 200 nM Cx50-3 mimetic peptide added to both patch pipettes, but not the scrambled control Cx50 CaMBD peptide. **B**, A distinct Cx43 CL mimetic peptide reported to inhibit Cx43 hemichannel activity, but not Cx43 gap junction coupling, was examined for possible effects on Cx43  $Ca^{2+}$ /CaM-induced uncoupling (24). 100  $\mu$ M Gap19 peptide added to both whole cell patch pipettes neither inhibited Cx43  $G_j$  nor prevented the decline in  $G_j$  induced by 1.8 mM  $CaCl_2$ /ionomycin saline perfusion.

**Figure 4.**  $V_j$ -gating and channel conductance properties of Cx43-M257 ventricular gap junctions. **A**, Average junctional current – transjunctional voltage relationship ( $I_j - V_j$ ) from six Cx43-M257 ventricular cardiomyocyte cell pairs obtained during a continuous 200 msec per mV  $V_j$  ramp from 0 to  $\pm$  120 mV (inactivation) and back to 0 mV (recovery). Absent from these traces is the increased linear slope conductance during the recovery phase observed in wild type Cx43 ventricular cardiomyocyte gap junctions (27). **B**, Corresponding average  $G_j - V_j$  inactivation (—) and recovery (—) curves depicting the typical bell-shaped curve with Boltzmann equation fits of the data (see Table 1). Again, the lack of the “facilitation” of  $G_j$  is

apparent, wherein facilitation is defined as a peak  $G_j$  during the recovery phase  $> 1$  since  $G_j$  is normalized to the actual junctional conductance ( $g_j$ ) value for each cell pair at  $V_j = 0$  mV prior to the application 200 msec/mV  $V_j$  inactivation and recovery ramps. **C**, The kinetics of  $V_j$ -dependent inactivation of wild type (WT) and Cx43-M257 ventricular cardiomyocytes were determined from 5-7 cell pairs in response to  $V_j$  pulses from -60 to -140 mV in 10 mV increments according to the methods of Lin et al. (27). Exponential fits of the slow inactivation rates ( $K_{on,slow}$ ) from WT mice revealed an e-fold change in rate for every  $17.2 \pm 0.9$  mV compared to  $22.8 \pm 1.7$  mV for Cx43-M257 myocytes. The fast inactivation component was absent in Cx43-M257 myocytes, consistent with previous findings (25,26). **D**,  $G_j$  inactivation during a 1 Hz ventricular action potential waveform from WT (—) and Cx43-M257 (—) cardiomyocytes. Owing to the slower inactivation kinetics and reduced  $V_j$ -sensitivity of the Cx43-M257 gap junctions,  $V_j$ -dependent inactivation of  $G_j$  during the action potential was reduced to 10% compared to 50% for WT Cx43 cardiomyocyte gap junctions. **E**, Gap junction channel activity observed in a Cx43-M257 myocyte cell pair during one 7.5 sec, -60 mV  $V_j$  pulse. Larger unitary current events corresponded to single gap junction channel conductances ( $\gamma_j$ ) of  $\approx 100$  pS were readily observed, but brief smaller unitary currents (\*) with  $\gamma_j \approx 60$  pS were also observed. **F**, All points histogram of the entire  $I_2$  current trace shown in panel E illustrates the dominance of the 100 pS channel current events with smaller, less frequent events being lost in the noise of the dual whole cell current recording.

**Table 1**

| <b>Inactivation</b> | <b>G<sub>max</sub></b> | <b>G<sub>min</sub></b> | <b>V<sub>1/2</sub> (mV)</b> | <b>Valence (z)</b> | <b>R</b> | <b>N</b> |
|---------------------|------------------------|------------------------|-----------------------------|--------------------|----------|----------|
| -V <sub>j</sub>     | 1.06 ± 0.006           | 0.32 ± 0.015           | -74.3 ± 0.8                 | 1.22 ± 0.05        | 0.95     | 6        |
| +V <sub>j</sub>     | 1.02 ± 0.002           | 0.22 ± 0.003           | +66.7 ± 0.2                 | 2.15 ± 0.04        | 0.97     |          |
| <b>Recovery</b>     | <b>G<sub>max</sub></b> | <b>G<sub>min</sub></b> | <b>V<sub>1/2</sub> (mV)</b> | <b>Valence (z)</b> | <b>R</b> | <b>N</b> |
| -V <sub>j</sub>     | 0.86 ± 0.007           | 0.40 ± 0.016           | -71.1 ± 1.4                 | 1.13 ± 0.08        | 0.94     | 6        |
| +V <sub>j</sub>     | 0.92 ± 0.005           | 0.44 ± 0.007           | +65.0 ± 0.6                 | 1.26 ± 0.05        | 0.96     |          |

$$G_j^{ss} = \left[ G_{ss}^{\max} \cdot \left[ \exp\left( A \cdot \left( V_j - V_{1/2} \right) \right) \right] + G_{ss}^{\min} \right] / \left[ 1 + \left[ \exp\left( A \cdot \left( V_j - V_{1/2} \right) \right) \right] \right]$$

## References

1. Harris, A. L. 2007. Connexin channel permeability to cytoplasmic molecules. *Prog. Biophys. Molec. Biol.* 94:120-143.
2. Valiunas, V., I. S. Cohen, and P. R. Brink. 2018. Defining the factors that affect solute permeation of gap junction channels *Biochim. Biophys. Acta* 1860:96-101.
3. Bukauskas, F. F., and V. K. Verselis. 2004. Gap junction channel gating. *Biochim. Biophys. Acta* 1662:42-60.
4. Harris, A. L. 2004. Emerging issues of connexin channels: biophysics fills the gap. *Q. Rev. Biophys.* 34:325-472.
5. Rose, B., and W. R. Loewenstein. 1975. Permeability of cell junction depends on local cytoplasmic calcium activity. *Nature* 254:250-252.
6. Turin, L., and A. Warner. 1977. Carbon dioxide reversibly abolishes ionic communication between cells of early amphibian embryo. *Nature* 270:56-57.
7. De Mello, W. C., G. E. Motta, and M. Chapeau. 1969. A study on the healing-over of myocardial cells of toads. *Circ. Res.* 24:475-487.
8. Peracchia, C. 2004. Chemical gating of gap junction channels; roles of calcium, pH and calmodulin. *Biochim. Biophys. Acta* 1662:61-80.
9. Spray, D. C., A. L. Harris, and M. V. Bennett. 1981. Gap junctional conductance is a simple and sensitive function of intracellular pH. *Science* 211:712-715.
10. Burt, J. M. 1987. Block of intercellular communication: interaction of intracellular H<sup>+</sup> and Ca<sup>2+</sup>. *Am. J. Physiol. Cell Physiol.* 253:C607-C612.

11. Peracchia, C. 1990. Increase in gap junction resistance with acidification in crayfish septate axons is closely related to changes in intracellular calcium but not hydrogen ion concentration. *J. Membr. Biol.* 113:75–92.
12. White, R. L., J. E. Doeller, V. K. Verselis, and B. A. Wittenberg. 1990. Gap junctional conductance between pairs of ventricular myocytes is modulated synergistically by H<sup>+</sup> and Ca<sup>++</sup>. *J. Gen. Physiol.* 95:1061-1075.
13. Morley, G. E., S. M. Taffet, and M. Delmar M. 1996. Intramolecular interactions mediate pH regulation of connexin43 channels. *Biophys. J.* 70:1294-1302.
14. Duffy, H. S., P. L. Sorgen, M. E. Girvin, P. O'Donnell, W. Coombs, S. M. Taffet, M. Delmar, and D. C. Spray DC. 2002. pH-dependent intramolecular binding and structure involving Cx43 cytoplasmic domains. *J. Biol. Chem.* 277:36706-36714.
15. Welsh, M. J., J. C. Aster, M. Ireland, J. Alcala, and H. Maisel. 1982. Calmodulin binds to chick lens gap junction protein in a calcium-independent manner. *Science* 216:642-644.
16. Peracchia, C., X. Wang, L. Li, and L. L. Peracchia. 1996. Inhibition of calmodulin expression prevents low-pH-induced gap junction uncoupling in *Xenopus* oocytes. *Pflügers Arch.* 431:379-387.
17. Török, K., K. Stauffer, and W. H. Evans. 1997. Connexin 32 of gap junctions contains two cytoplasmic calmodulin-binding domains. *Biochem. J.* 326:479-483.
18. Zhou, Y., W. Yang, M. M. Lurtz, Y. Ye, Y. Huang, H. W. Lee, Y. Chen, C. F. Louis, and J. J. Yang. 2007. Identification of the calmodulin binding domain of connexin 43. *J. Biol. Chem.* 282:35005-35017.

19. Zhou, Y., W. Yang, M. M. Lurtz, Y. Chen, J. Jiang, Y. Huang, C. F. Louis, and J. J. Yang. 2009. Calmodulin mediates the  $\text{Ca}^{2+}$ -dependent regulation of Cx44 gap junctions. *Biophys. J.* 96:2832-2848.
20. Chen, Y., Y. Zhou, X. Lin, H. C. Wong, Q. Xu, J. Jiang, S. Wang, M. M. Lurtz, C. F. Louis, R. D. Veenstra, and J. J. Yang. 2011. Molecular interaction and functional regulation of connexin50 gap junctions by calmodulin. *Biochem. J.* 435:711-722.
21. Zou, J., M. Salarian, Y. Chen, Y. Zhuo, N. E. Brown, J. R. Hepler, and J. J. Yang. 2017. Direct visualization of interaction between calmodulin and connexin45. *Biochem. J.* 474:4035-4051.
22. Xu, Q., R. F. Kopp, Y. Chen, J. J. Yang, M. W. Roe, and R. D. Veenstra. 2012. Gating of connexin 43 gap junctions by a cytoplasmic loop calmodulin binding domain. *Am. J. Physiol. Cell. Physiol.* 302:C1548-C1556.
23. Maass, K., A. Ghanem, I. S. Kim, M. Saathoff, S. Urschel, G. Kirfel, R. Grümmer, M. Kretz, T. Lewalter, K. Tiemann, E. Winterhager, V. Herzog, and K. Willecke. 2004. Defective epidermal barrier in neonatal mice lacking the C-terminal region of connexin43. *Mol. Biol. Cell* 15:4597-4608.
24. Wang, N., E. De Vuyst, R. Ponsaerts, K. Boengler, N. Palacios-Prado, J. Wauman, C. P. Lai, M. De Bock, E. Decrock, M. Bol, M. Vinken, V. Rogiers, J. Tavernier, W. H. Evans, C. C. Naus, F. F. Bukauskas, K. R. Sipido, G. Heusch, R. Schulz, G. Bultynck, and L. Leybaert. 2013. Selective inhibition of Cx43 hemichannels by Gap19 and its impact on myocardial ischemia/reperfusion injury. *Basic Res. Cardiol.* 108:309.
25. Revilla, A., C. Castro, and L. C. Barrio. 1999. Molecular dissection of transjunctional voltage dependence in the connexin-32 and connexin-43 junctions. *Biophys. J.* 77:1374-1383.

26. Moreno, A. P., M. Chanson, J. Anumonwo, I. Scerri, H. Gu, S. M. Taffet, and M. Delmar. 2002. Role of the carboxyl terminal of connexin43 in transjunctional fast voltage gating. *Circ. Res.* 90:450-457.
27. Lin, X., J. Gemel, E. C. Beyer, and R. D. Veenstra. 2005. Dynamic model for ventricular junctional conductance during the cardiac action potential. *Am. J. Physiol. Heart Circ. Physiol.* 288:H1113-H1123.
28. Veenstra, R. D. 2016. Establishment of the Dual Whole Cell Recording Patch Clamp Configuration for the Measurement of Gap Junction Conductance. *Methods Mol. Biol.* 1437:213-231.
29. Lin, X., C. Zemlin, J. K. Hennan, J. S. Petersen, and R. D. Veenstra. 2008. Enhancement of ventricular gap junction coupling by rotigaptide. *Cardiovasc. Res.* 79:416-426.
30. Xu, Q., X. Lin, L. Andrews, D. Patel, P. D. Lampe, and R. D. Veenstra. 2013. Histone deacetylase inhibition reduces cardiac connexin43 expression and gap junction communication. *Front. Pharmacol.* 4:44.



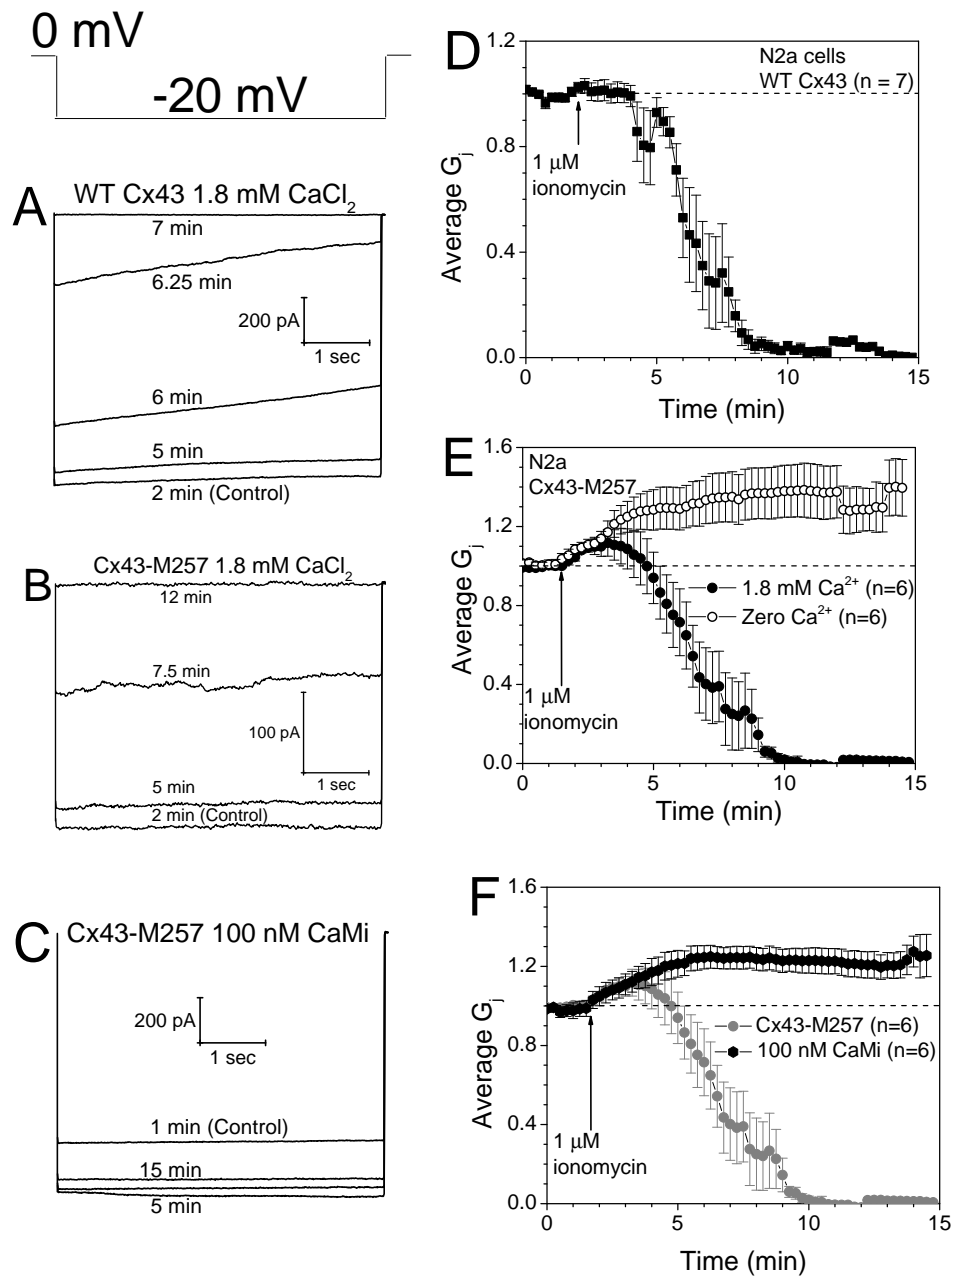

Figure 1

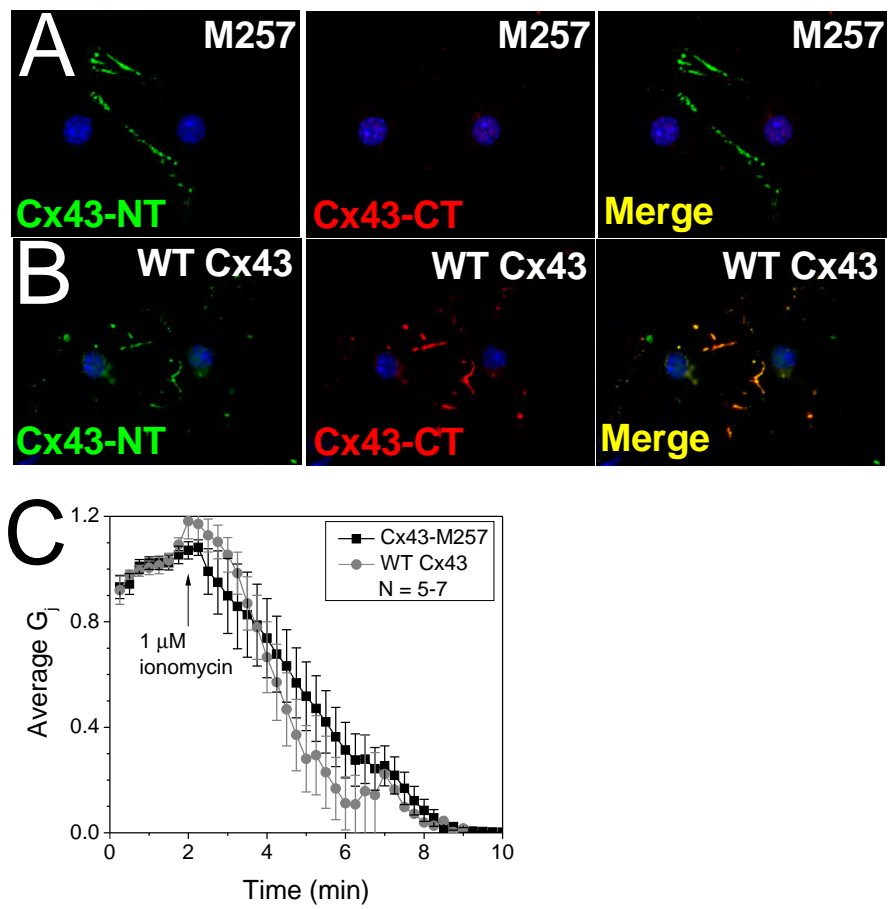

Figure 2

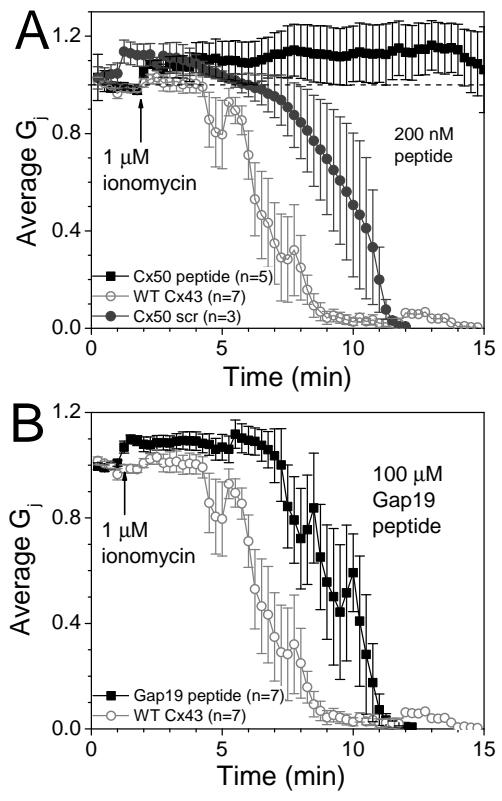

Figure 3

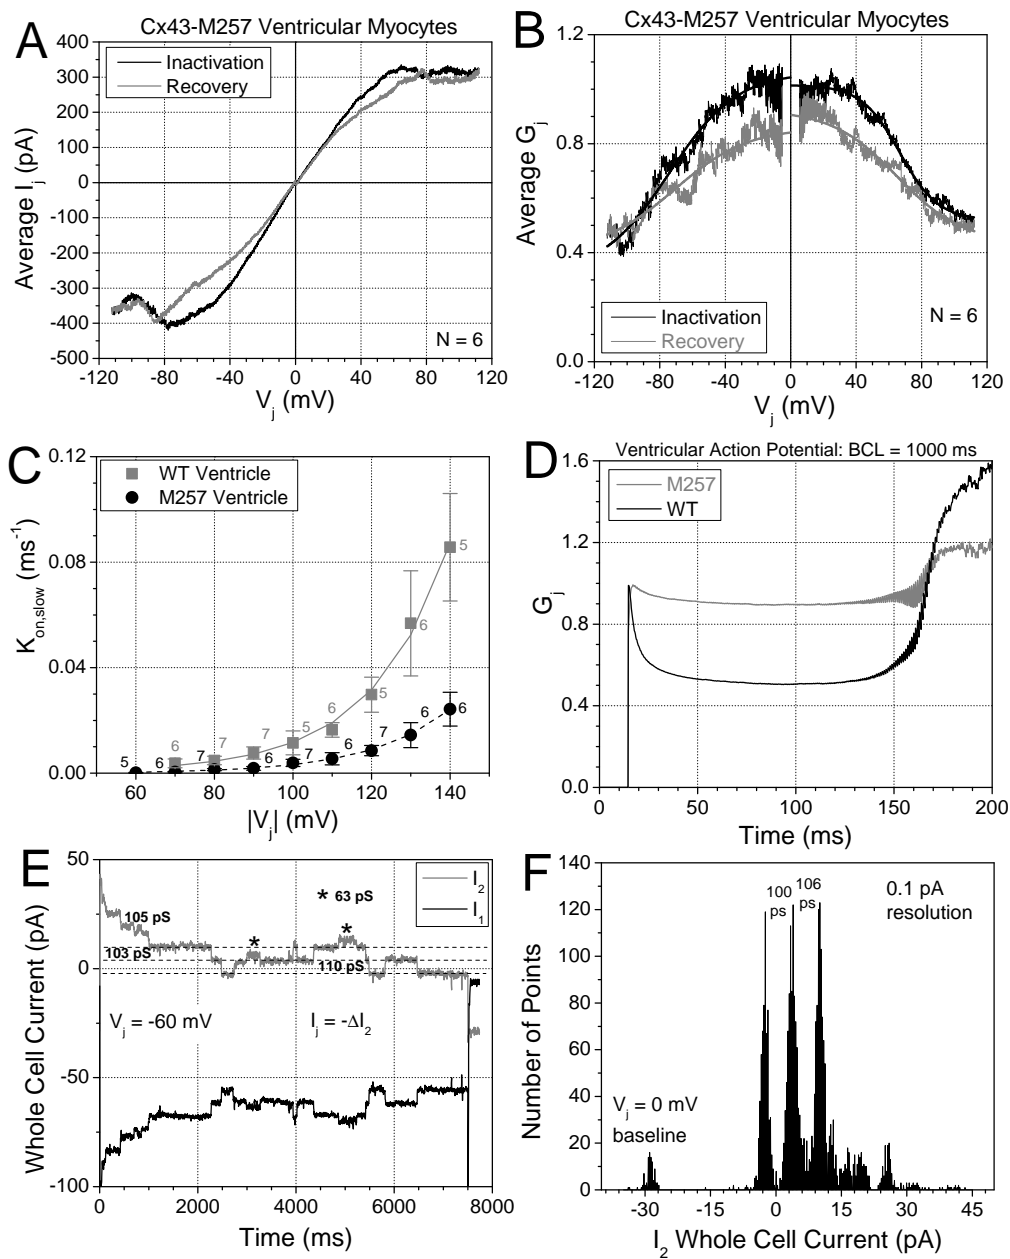

Figure 4
